# Supplementary material
Source: publisher site journal article supplement (https://www.dovepress.com/article/242745)
Supplement: Supplementary file 1 [file get_supplementary_file.php]

**Figure S1**

**
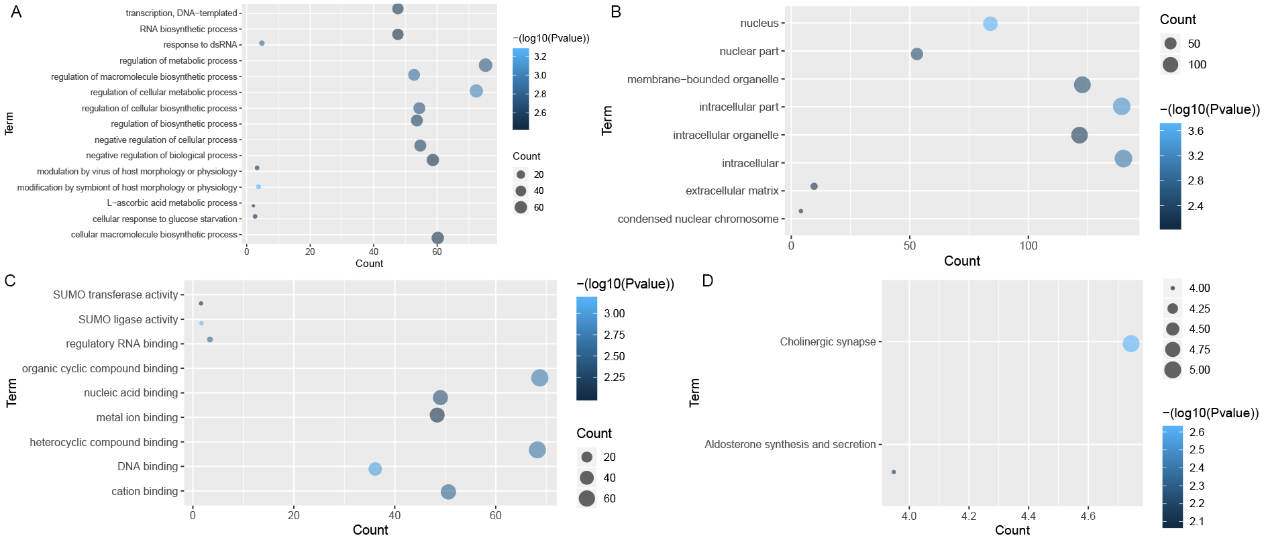
**

**Figure S1** Significantly enriched GO terms and KEGG pathways of DElncRNA-nearby DEmRNAs.

A). BP, biological process; B). CC, cellular component; C). MF, molecular function; D) KEGG pathways. The x-axis shows counts of DEmRNAs enriched in GO terms or KEGG pathways and the y-axis shows GO terms or KEGG pathways. The color scale represented -lg p-value.

**Figure S2**

**
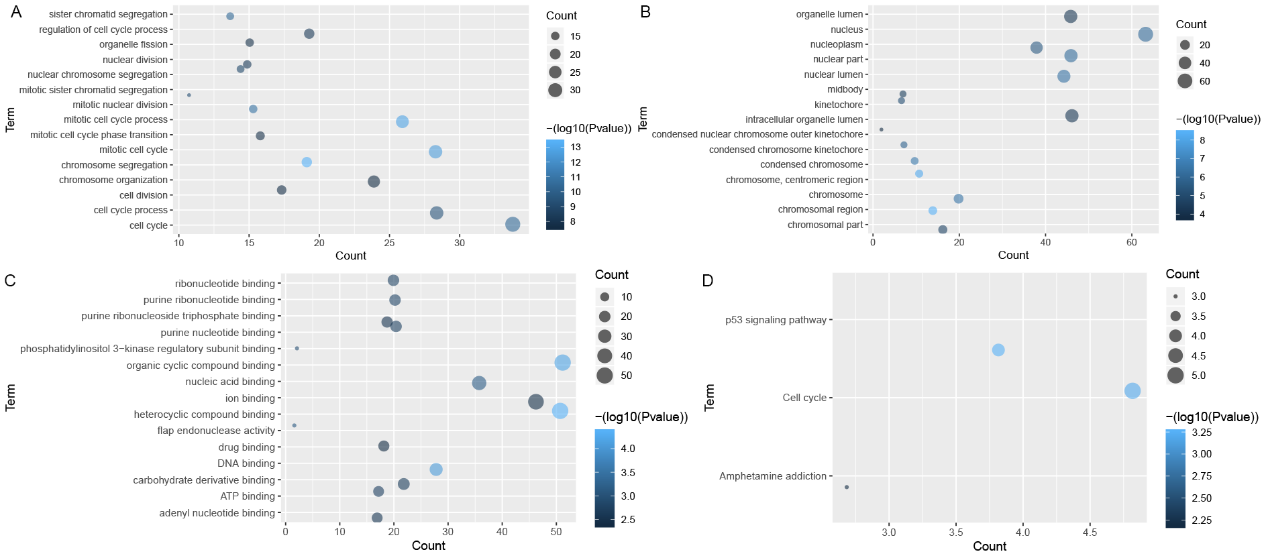
**

**Figure S2** Significantly enriched GO terms and KEGG pathways of DEmRNAs co-expressed with DElncRNAs.

A). BP, biological process; B). CC, cellular component; C). MF, molecular function; D) KEGG pathways. The x-axis shows counts of DEmRNAs enriched in GO terms or KEGG pathways and the y-axis shows GO terms or KEGG pathways. The color scale represented -lg p-value.

**Figure S3**


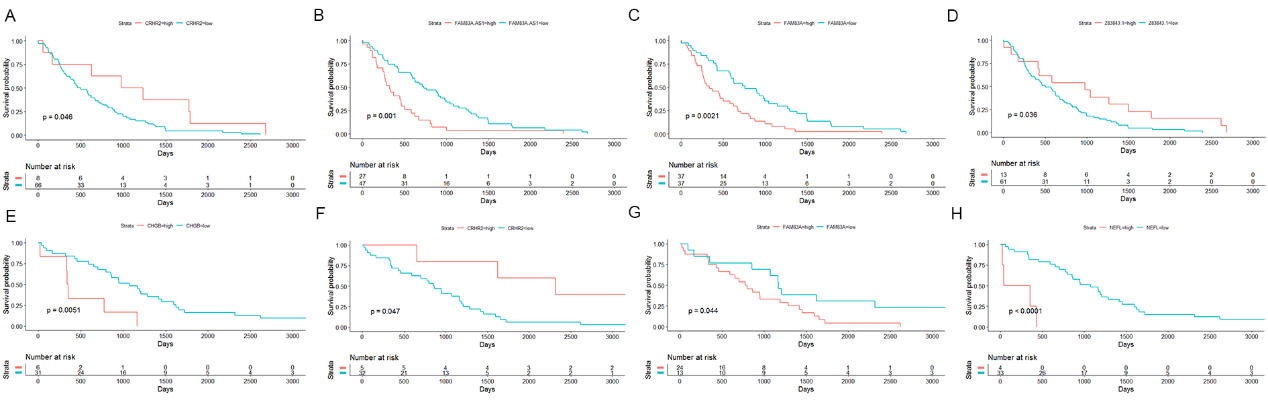


**Figure S3** Survival analysis of selected DEmRNAs and DElncRNAs in metastatic LUAD groups (A-D) and non-metastatic LUAD groups (E-H).

A). CRHR2; B). FAM83A-AS1; C). FAM83A; D) Z83843.1; E). CHGB; F). CRHR2; G). FAM83A; H). NEFL. The x-axis indicated times (days) and y-axis indicated survival rate.
